# Supplementary material for: Fish CDK2 recruits Dtx4 to degrade TBK1 through ubiquitination in the antiviral response
Source: eLife journal article supplement (doi:10.7554/elife.98357), 2024-07-24
Supplement: fig2-data1 [file Figure 2-source data.pdf › Figure 2-source data 1/Figure 2-source data.pdf]

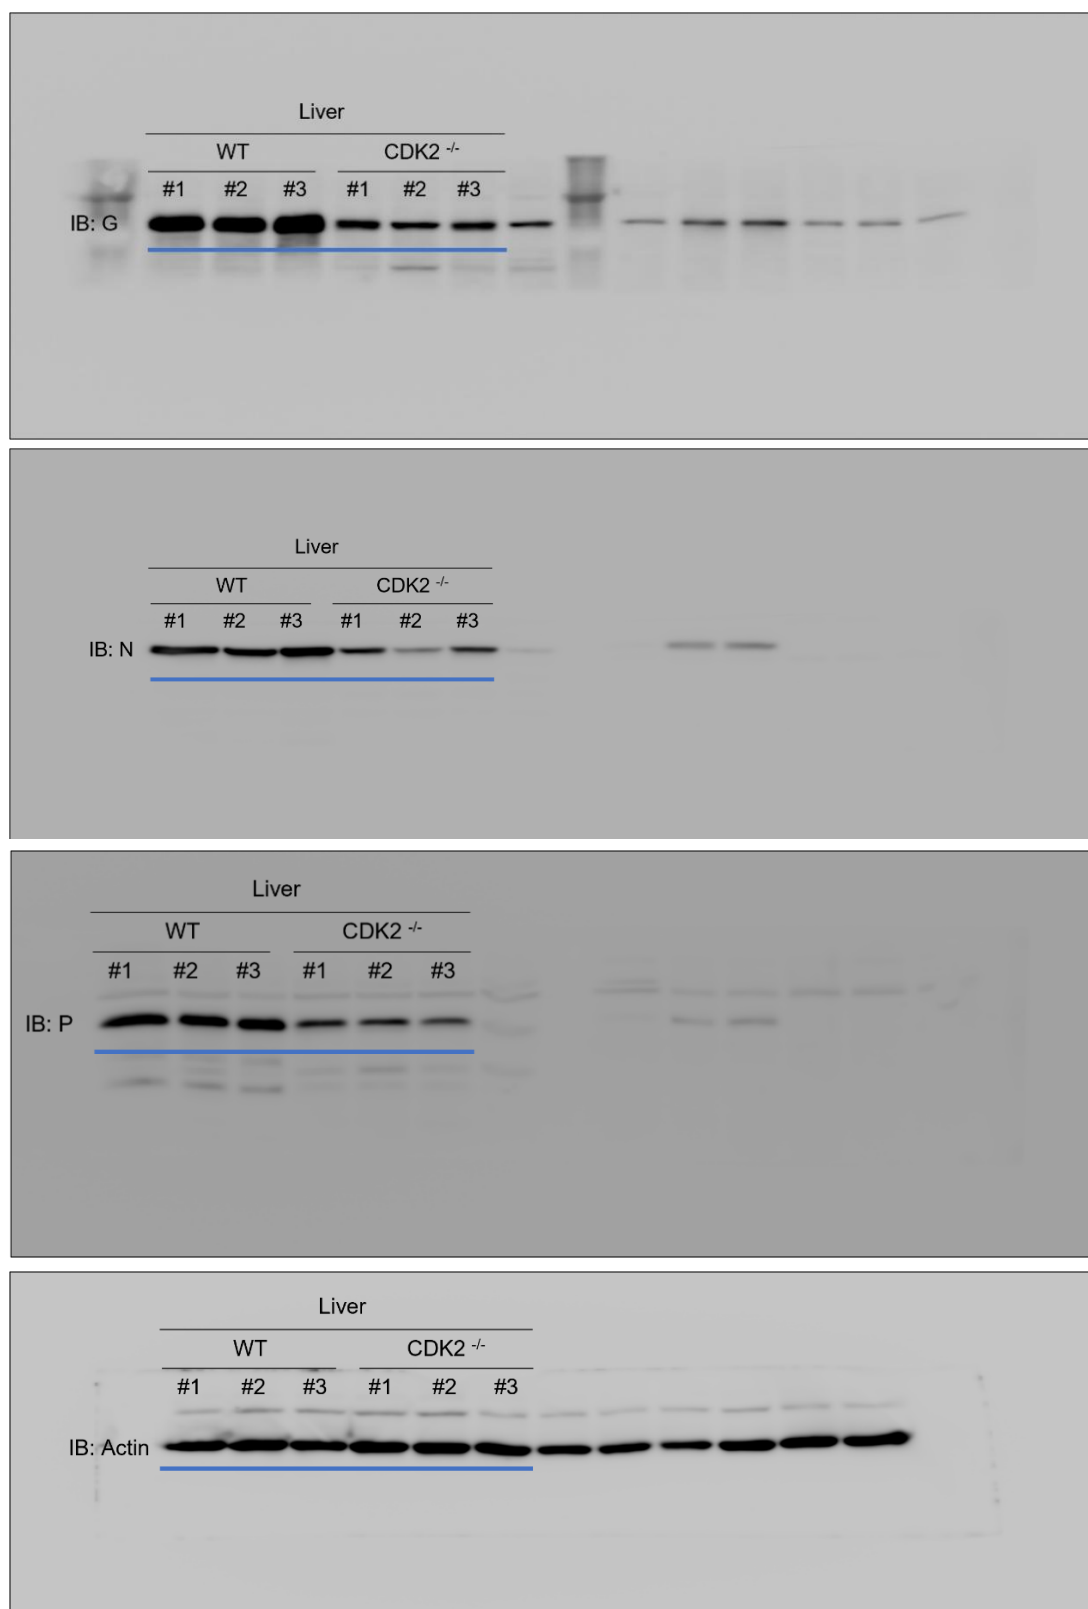

Figure 2, Source Data 1. Original membranes corresponding to Figure 2, panel D (Liver). Each membrane is labelled with the relevant information. The blue lines indicate the corresponding bands.

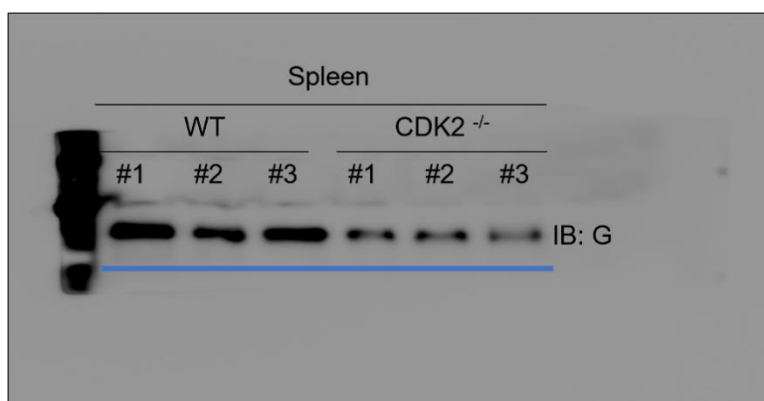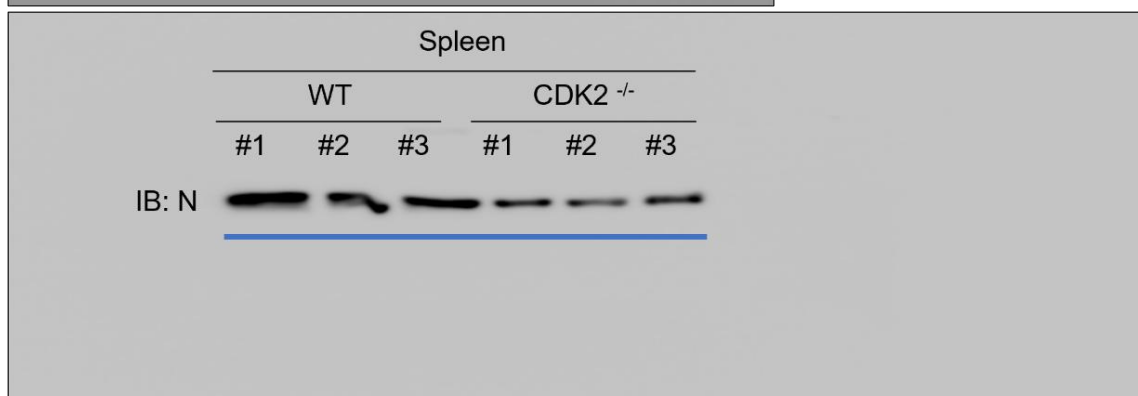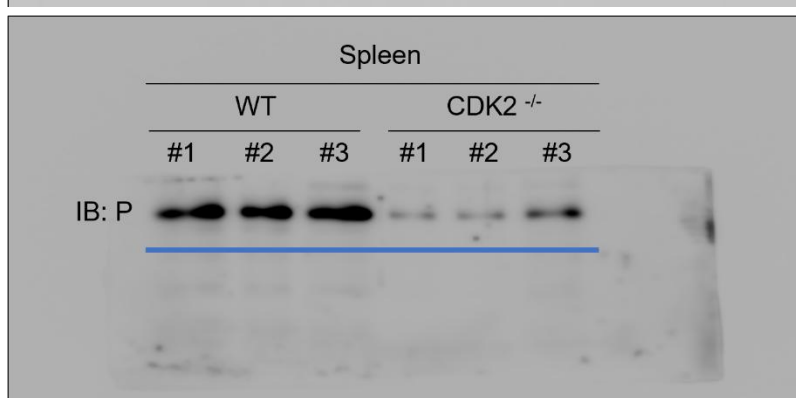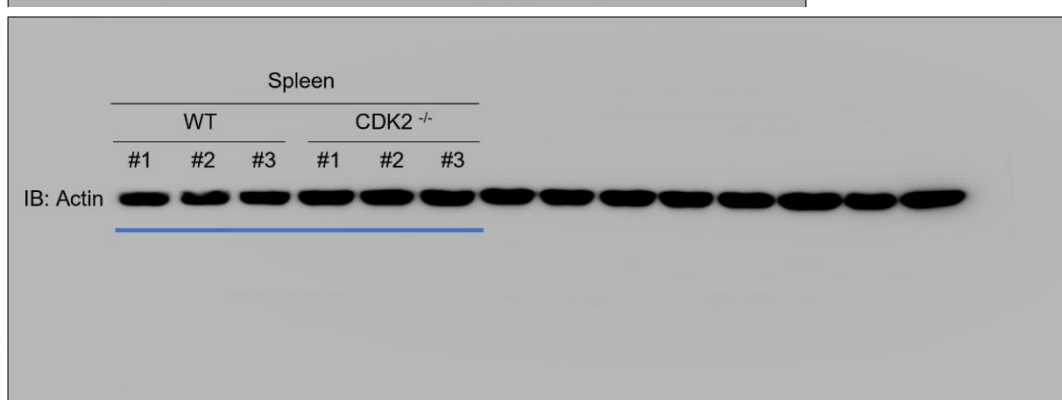

Figure 2, Source Data 1. Original membranes corresponding to Figure 2, panel D (Spleen). Each membrane is labelled with the relevant information. The blue lines indicate the corresponding bands.

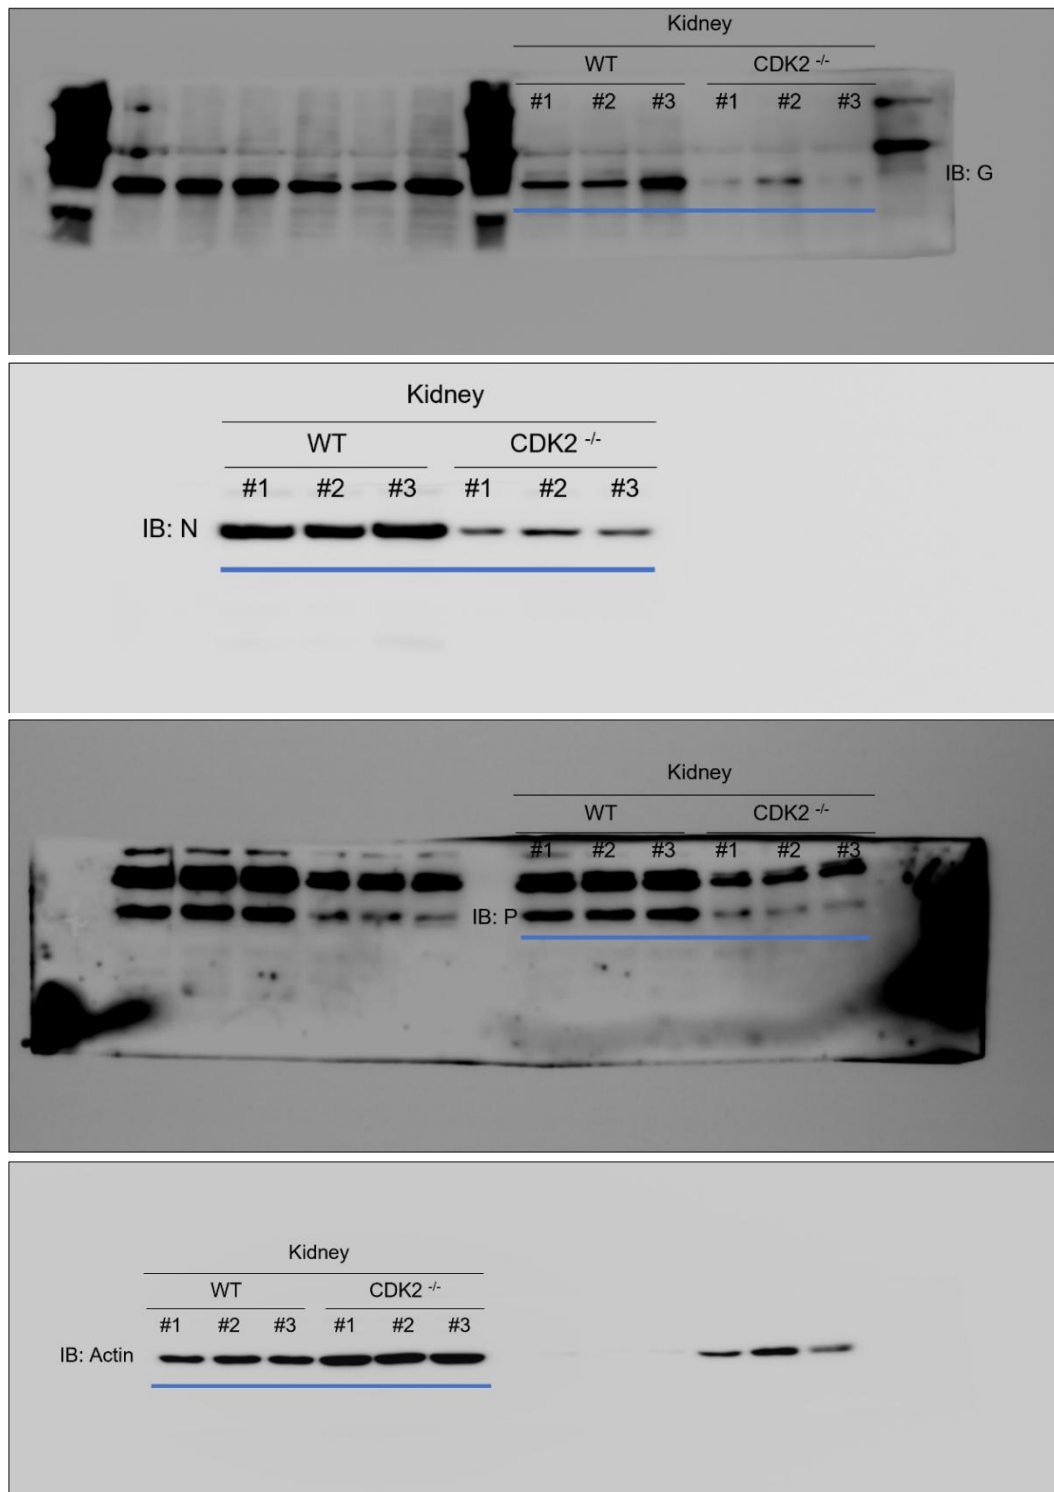

Figure 2, Source Data 1. Original membranes corresponding to Figure 2, panel D (Kidney). Each membrane is labelled with the relevant information. The blue lines indicate the corresponding bands.
