# Supplementary material for: Fish CDK2 recruits Dtx4 to degrade TBK1 through ubiquitination in the antiviral response
Source: eLife journal article supplement (doi:10.7554/elife.98357), 2024-07-24
Supplement: fig5-data1 [file Figure 5-source data.pdf › Figure 5-source data 1/Figure 5-source data.pdf]

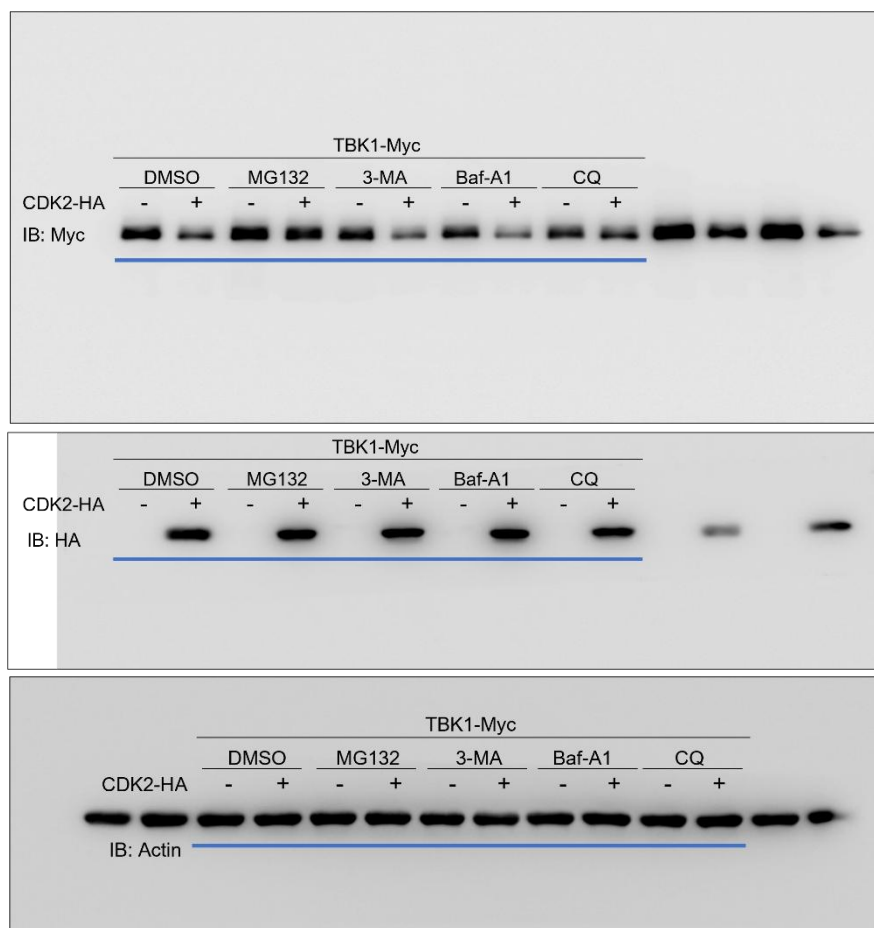

Figure 5, Source Data 1. Original membranes corresponding to Figure 5, panel B. Each membrane is labelled with the relevant information. The blue lines indicate the corresponding bands.

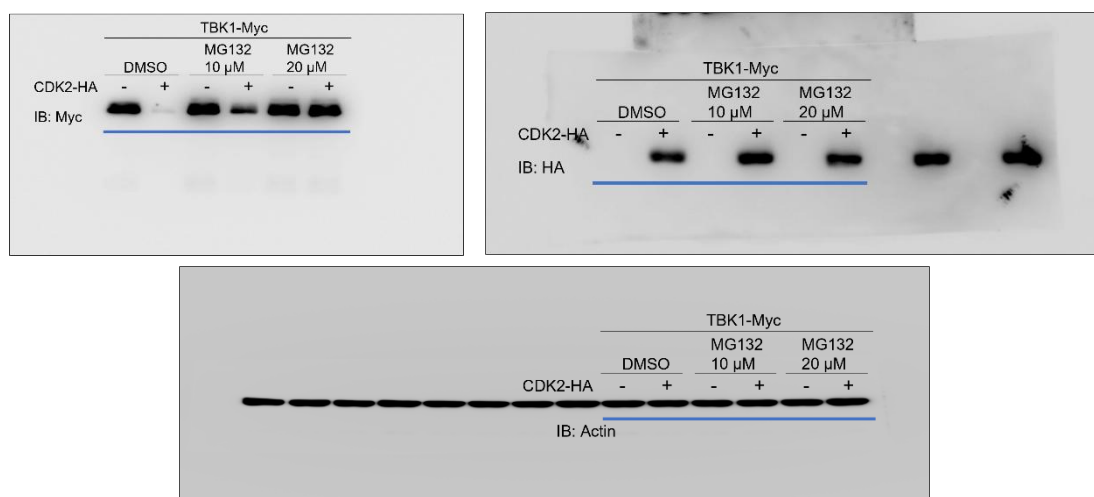

Figure 5, Source Data 1. Original membranes corresponding to Figure 5, panel C. Each membrane is labelled with the relevant information. The blue lines indicate the corresponding bands.

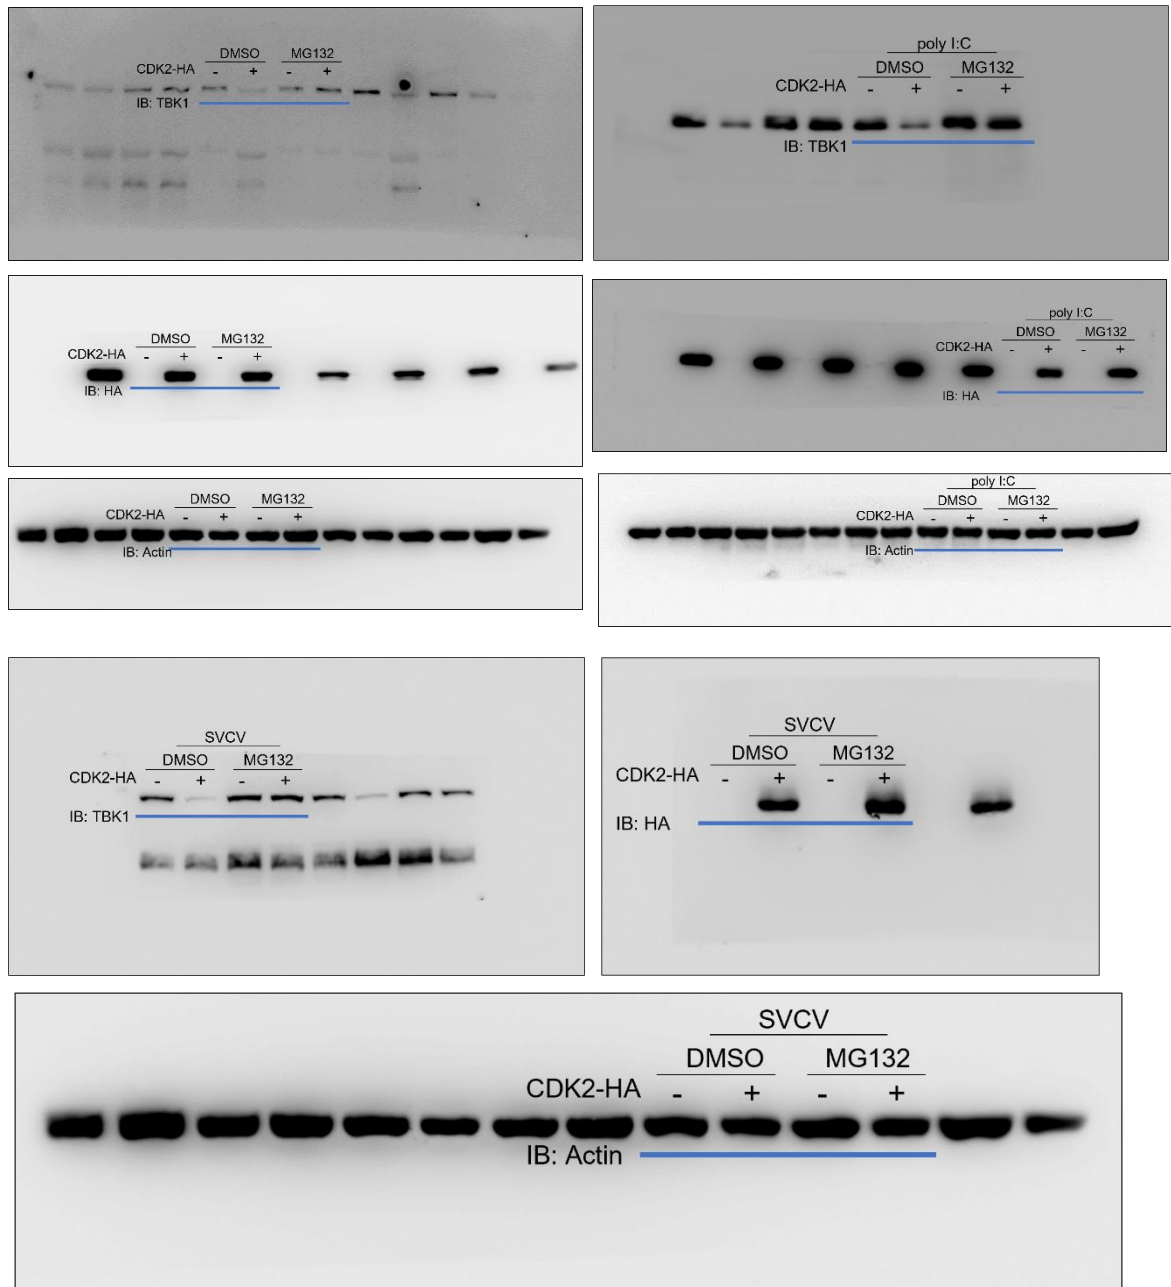

Figure 5, Source Data 1. Original membranes corresponding to Figure 5, panel D. Each membrane is labelled with the relevant information. The blue lines indicate the corresponding bands.

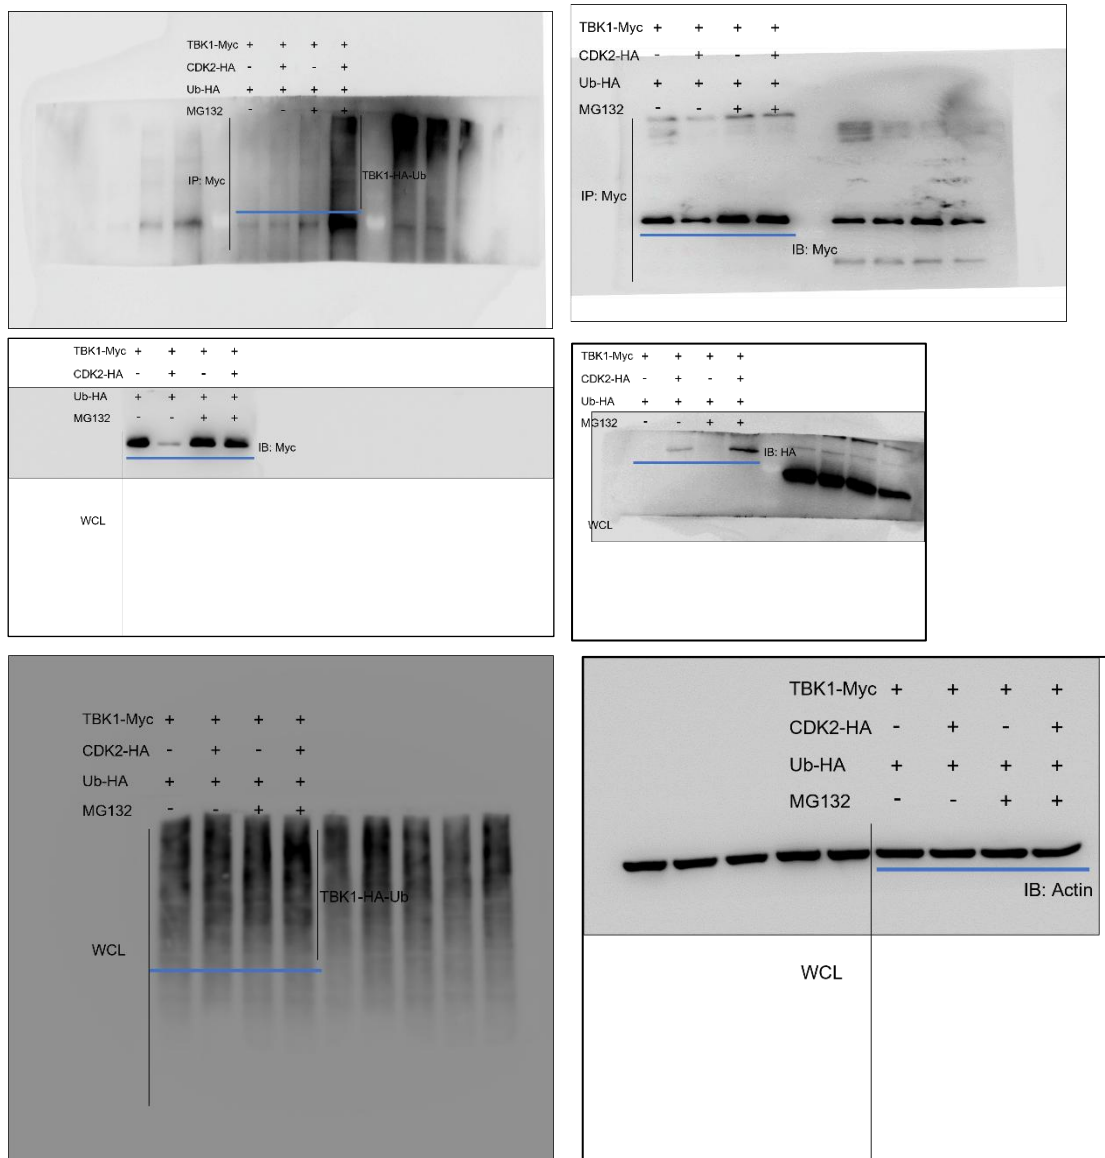

Figure 5, Source Data 1. Original membranes corresponding to Figure 5, panel E. Each membrane is labelled with the relevant information. The blue lines indicate the corresponding bands.

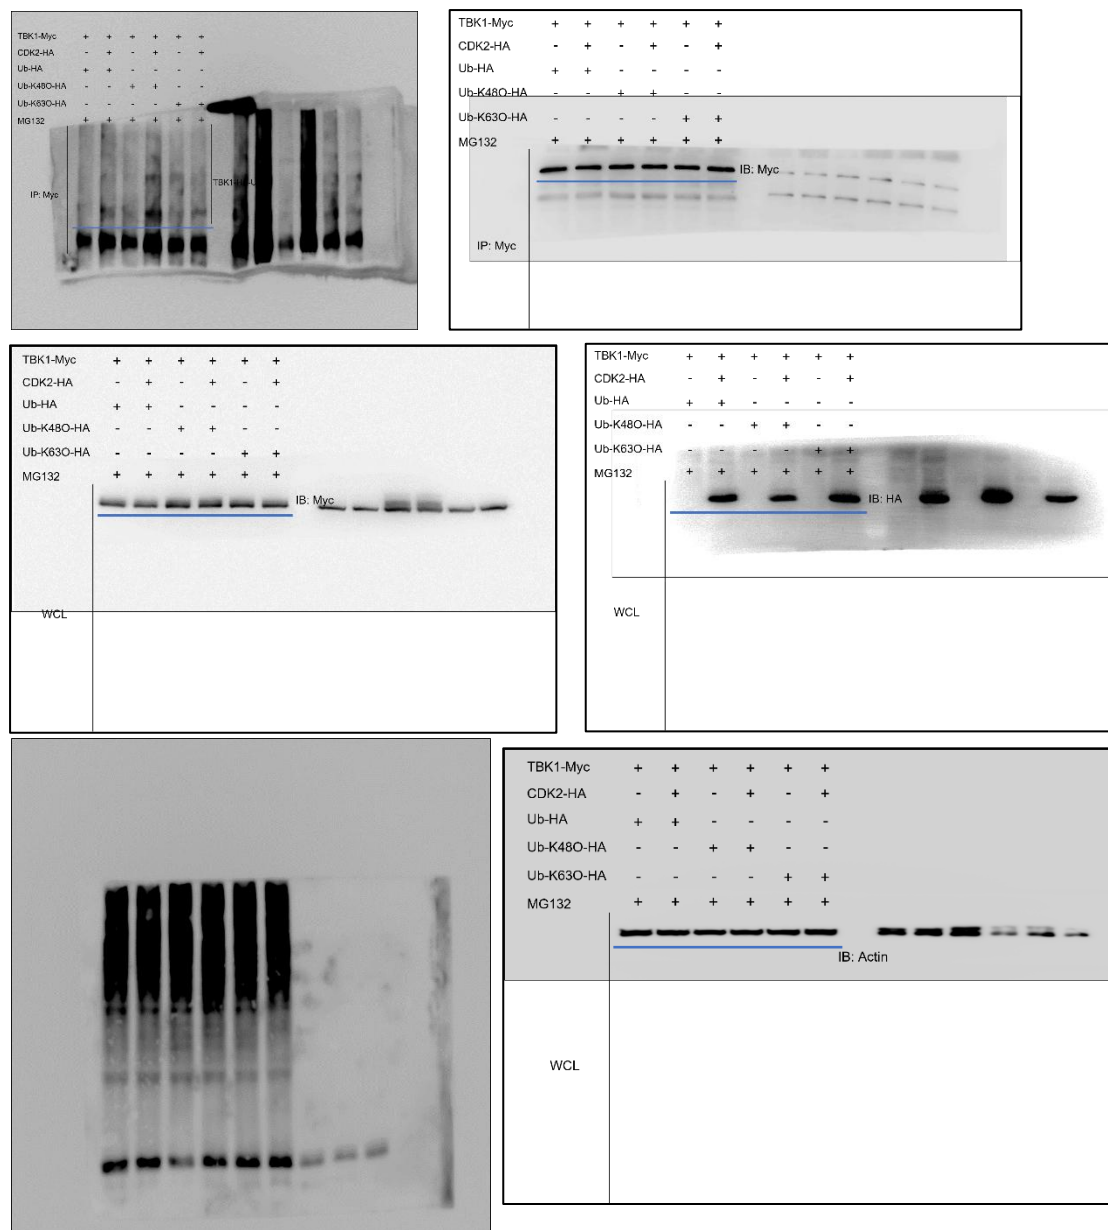

Figure 5, Source Data 1. Original membranes corresponding to Figure 5, panel G. Each membrane is labelled with the relevant information. The blue lines indicate the corresponding bands.

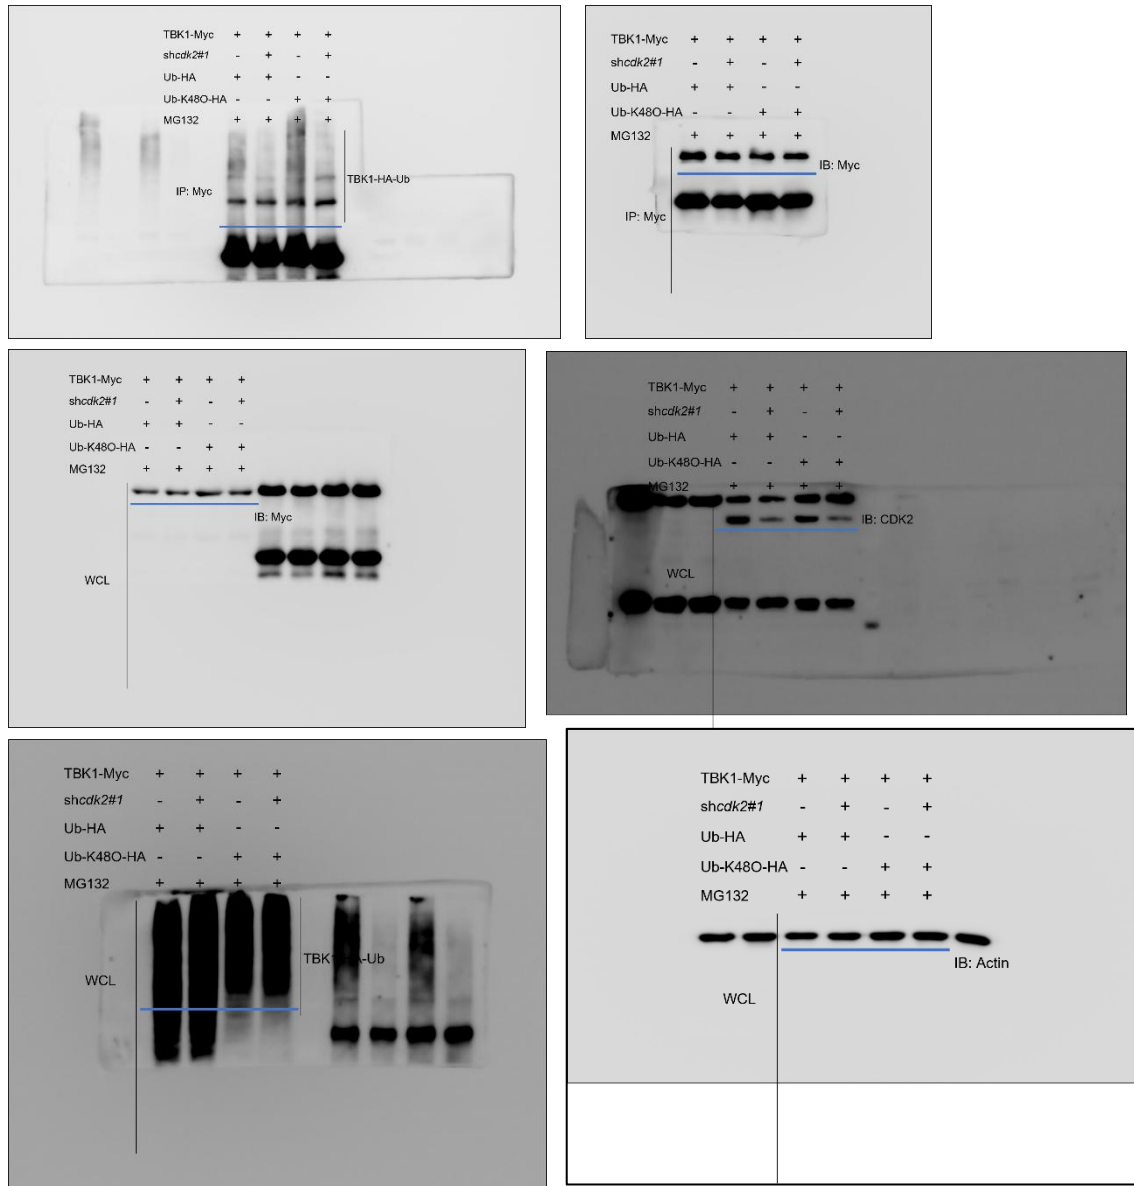

Figure 5, Source Data 1. Original membranes corresponding to Figure 5, panel H. Each membrane is labelled with the relevant information. The blue lines indicate the corresponding bands.
