# Supplementary material for: Fish CDK2 recruits Dtx4 to degrade TBK1 through ubiquitination in the antiviral response
Source: eLife. 2026 Jan 14;13:RP98357. doi: 10.7554/eLife.98357 (PMC12803515; doi:10.7554/eLife.98357)
Supplement: Figure 1—source data 3. [file elife-98357-fig1-data3.xlsx]

## Sheet: 1 B
Liver
gene ID	PBS-1	PBS-2	PBS-3	SVCV-1	SVCV-2	SVCV-3
cdk1	0.872554	0.932976	1.58926	1.88528	1.74219	0.92112
cdk2	1.19204	1.33542	1.2005	3.71109	4.46266	4.15742
cdk4	11.3861	11.0735	15.7876	21.1919	19.978	15.2685
cdk5	1.18241	0.116739	0.755658	0.233352	0.573489	0.701285
cdk6	0.193633	0.242154	0.360095	0.181517	0.396532	0.311511
cdk7	9.55176	5.76504	6.17578	5.96937	7.48332	5.10306
cdk8	4.58593	2.46965	4.10455	5.49198	5.4146	5.29499
cdk9	15.2116	9.65877	12.3274	10.5735	13.7895	14.9828
cdk10	1.34483	0.710483	1.6753	1.51796	1.88284	1.76165
cdk11b	9.44205	6.40506	8.78379	9.79053	11.3576	7.69577
cdk12	3.82094	2.65088	3.83151	4.92741	6.09624	3.7565
cdk13	5.07567	4.49634	5.06015	5.72766	5.87404	4.69251
cdk14	0.195341	0.507371	0.355052	0.295805	0.184629	0.190651
cdk15	0.0235448	0.01589	0.0111	0.01253	0.0120541	0.0426129
cdk16	4.68476	2.31545	4.29145	4.33433	4.25459	5.18557
cdk17	2.4892	1.26075	2.90743	2.95923	2.47925	3.24914
cdk19	0.279449	0.304842	0.458545	0.174642	0.357669	0.224784
cdk20	0.268127	0.1253	0.26398	0.179535	0.392203	0.508381
cdk21	0.490676	0.381529	0.375453	1.33763	1.45343	1.26608
Spleen
gene ID	PBS-1	PBS-2	PBS-3	SVCV-1	SVCV-2	SVCV-3
cdk1	15.828	14.8652	8.9472	29.6355	25.1163	20.3917
cdk2	5.77899	3.37591	5.00581	14.0881	10.1494	10.127
cdk4	17.8717	18.7774	19.9168	22.7199	19.9743	19.3759
cdk5	3.75156	1.62629	2.764	1.18867	2.67223	5.34258
cdk6	2.64113	2.48683	2.05594	4.59514	4.19407	4.51497
cdk7	10.9907	9.4572	8.94025	21.1904	19.2317	16.9986
cdk8	16.3781	11.9099	11.03	16.6197	18.3103	13.9972
cdk9	40.2265	22.015	28.8757	32.8825	46.5575	58.1554
cdk10	1.68459	2.06891	1.47525	3.57428	3.00362	1.63623
cdk11b	27.4356	17.7409	18.6439	26.6007	29.5457	29.7539
cdk12	12.5972	8.65622	10.8367	13.8804	14.9919	12.4384
cdk13	14.9132	10.3317	12.1745	17.2419	17.1763	15.8928
cdk14	3.82096	2.40136	2.63247	1.97255	2.26113	1.8454
cdk15	0.090323	0.0354974	0.0234367	0.0134917	0.0402614	0.0280737
cdk16	6.20639	6.0189	5.53507	5.75091	5.80499	4.97873
cdk17	7.31685	5.01518	7.43332	17.694	14.2013	15.8654
cdk19	2.14405	0.912843	1.32129	1.01901	2.0707	1.33281
cdk20	1.42743	1.07798	0.991326	1.47656	2.22697	1.14179
cdk21	0.185771	0.106471	0.210889	0.573896	0.434737	0.46516

## Sheet: 1 C
THP-1 cells stimulated with VSV			p值
0 h	1	0.08175
3 h	1.10358	0.05187	p=0.0133177781158515
6 h	1.1612	0.011169	p=0.0291824621451783
9 h	0.62281	0.03873	p=0.00215404946045499
GICB cells stimulated with CyHV-2
0 h	1	0.03181
24 h	9.48881	0.19327	p=0.0000602846120299384
36 h	14.5723	0.87327	p=0.000639406469425989
48 h	6.04007	0.55453	p=0.00178314137208534
60 h	5.17099	0.42217	p=0.00145346359867917
ZF4 cells stimulated with SVCV			p值
0 h	1	0.10107
6 h	1.05299	0.13073	p=0.0452409858942301
12 h	1.42848	0.09366	p=0.0000498378293002387
24 h	1.88592	0.12744	p=0.000147600441849922
48 h	2.61625	0.18962	p=0.00049952542953348
EPC cells stimulated with SVCV			p值
0 h	1	0.02368
6 h	1.93524	0.03803	p=0.0000392333404131754
12 h	2.08471	0.1151	p=0.0391742134875909
24 h	2.65826	0.11554	p=9.80869897903737E-08
48 h	2.3963	0.15486	p=0.00146458665854437

## Sheet: 1 D
Liver
PBS	SVCV	p值
1	2.62611	p=0.0024
0.346054	5.45574
0.6742	2.94039
0.92239	3.28374
0.415953	6.70979
Spleen
PBS	SVCV	p值
2.35243	6.752	p=0.001
1	13.3333
3.05386	12.5582
4.44857	8.87075
5.41952	11.6273
