# Supplementary material for: Fish CDK2 recruits Dtx4 to degrade TBK1 through ubiquitination in the antiviral response
Source: eLife. 2026 Jan 14;13:RP98357. doi: 10.7554/eLife.98357 (PMC12803515; doi:10.7554/eLife.98357)
Supplement: Figure 2—source data 3. [file elife-98357-fig2-data3.xlsx]

## Sheet: 2 A
Days	WT	cdk2-/-	P 值	n=15
3	1		p=0.0369
4	1
4	1
5	1
5	1
5	1
6	1
6	1
7	1
7	0
7	0
7	0
7	0
7	0
7	0
5		1
6		1
7		1
7		1
7		0
7		0
7		0
7		0
7		0
7		0
7		0
7		0
7		0
7		0
7		0

## Sheet: 2 C
Liver
WT	CDK2-/-	p值
378.285	23.0026	p=0.021
1385.11	27.337
1410.73	89.5823
336.808	46.714
283.221	60.371
2584.71	28.6337
Spleen
WT	CDK2-/-	p值
73.3022	1.81977	p=0.005
82.4692	10.0019
49.6488	19.5549
61.0539	17.337
102.238	9.88872
210.506	2.24927
Kidney
WT	CDK2-/-	p值
66.6152	3.32242	p=0.0408
85.9714	1.74109
36.9897	2.82017
19.448	2.23582
46.3914	4.10046
253.49	1.04499

## Sheet: 2 G
id	cdk2-/--liver-1	cdk2-/--liver-3	WT-1-liver	WT-3-iver
mxb	310.382	277.055	8.90856	2.03362
traf3	47.2994	52.2927	3.16479	0.979009
nfkbiaa	1168.86	958.079	65.7148	10.3059
irf7	405.084	312.11	24.4196	6.07919
ifnphi1	2740.04	1908.12	13.826	6.43968
nfkb2	180.237	184.436	16.0848	4.06886
mxe	166.448	210.007	16.5186	3.47172
nfkbiab	3432.78	2628.87	274.98	22.3858
traf5	23.2781	16.1553	0.991112	0.270268
stat1a	98.661	79.8637	18.1832	17.2176
ifnphi2	190.525	123.876	0.421964	0.105477
mxa	74.737	57.7703	9.55472	1.73181
isg15	1302.01	1410.54	185.056	16.9522
traf2b	118.609	77.3228	3.38636	1.89913
ifnphi3	570.474	356.952	1.24742	0.709976
mxc	20.0626	25.5484	3.83972	0.482135
irf9	29.6318	37.9786	9.60723	5.88607
irf3	33.0011	28.0945	6.94637	1.30909
stat1b	162.868	139.1	33.7466	3.98424
map3k8	472.437	267.246	3.44076	1.39347
jun	504.177	880.243	34.7716	21.4099
tank	14.5969	7.69028	2.44484	1.69819
trim25	66.5309	62.5911	33.4138	15.9709
ifnphi4	451.319	153.414	0.460689	0.706298
tyk2	52.397	18.4869	1.73265	0.613639
jak1	40.5658	32.1202	24.5645	15.6854
nod1	63.9434	15.8016	0.431118	0.4461
nfkb1	33.624	8.32428	1.49513	0.873449
tbk1	62.2949	63.4059	43.4049	9.23497
pkz	39.8767	422.948	3.28169	2.15664
stat2	65.7958	50.1404	52.9249	21.8117

## Sheet: 2 H
Liver
WT	CDK2-/-	p值
1.2188	24.8605	p=0.0002
1.45761	12.1268
1.40262	20.3335
2.91963	21.6313
0.555936	11.4199
0.424142	9.59025
Sleen
WT	CDK2-/-	p值
0.136021	2.1822	p<0.0001
0.667012	3.39219
0.225321	2.03607
0.115508	2.98098
0.609536	3.40035
0.410087	2.82772
Kidney
WT	CDK2-/-	p值
0.490608	2.29376	p=0.0007
0.13451	1.80446
0.195367	2.10054
0.198731	3.75715
0.294387	5.4628
0.367492	2.5928
