# Supplementary material for: Fish CDK2 recruits Dtx4 to degrade TBK1 through ubiquitination in the antiviral response
Source: eLife. 2026 Jan 14;13:RP98357. doi: 10.7554/eLife.98357 (PMC12803515; doi:10.7554/eLife.98357)
Supplement: Figure 3—source data 3. [file elife-98357-fig3-data3.xlsx]

## Sheet: 3 A
IFN1φ1pro
	Vector		CDK2
Null	4.0333	4.5304	3.4859	3.8893
SVCV	48.7865	46.5142	18.0091	16.877	p<0.0001
poly I:C	102.146	98.1536	44.8089	45.6	p<0.0001
ISRE
	Vector		CDK2
Null	10.7013	9.5768	12.7364	12.6357
SVCV	472.339	475.607	259.19	240.081	p<0.0001
poly I:C	4839	4842	2172	2152	p<0.0001

## Sheet: 3 C
IFN1φ1pro
	shNC		shCDK2#1
Null	5.1455	5.3225	5.2132	5.1671
SVCV	21.6559	20.948	31.0203	29.8177	p=0.0004
poly I:C	181.299	180.562	252.374	249.078	p<0.0001
ISRE
	shNC		shCDK2#1
Null	8.5607	8.1518	8.6749	8.6692
SVCV	481.543	491.068	638.171	656.492	p<0.0001
poly I:C	5831	5657	6571	6438	p<0.0001

## Sheet: 3 D
ifn
	Vector		CDK2		p值
Null	1	0.2415	0.50358	0.18454
SVCV	5460.83	328.346	2636.22	489.457	p=0.0102873990278162
poly I:C	7459.04	426.918	3448.24	215.696	p=0.00329162135538835
vig1
	Vector		CDK2		p值
Null	1	0.06039	0.061032	0.17314
SVCV	551.297	25.6069	355.625	25.5646	p=0.00833574631528137
poly I:C	3332.61	140.035	1604.49	72.6771	p=0.001945745789699
ifn
	shNC		shCDK2#1		p值
Null	1	0.02327	1.12404	0.11969
SVCV	7852.27	402.334	10073.1	327.466	p=0.0130193824436037
poly I:C	9944.87	381.238	12040.1	246.421	p=0.0110149042451401
vig1
	shNC		shCDK2#1		p值
Null	1	0.12732	0.68012	0.11114
SVCV	495.686	15.8303	617.636	25.4245	p=0.0139563361231924
poly I:C	2421.02	111.523	3467.01	149.02	p=0.00763091334979608

## Sheet: 3 E
	Vector			CDK2			p值
SVCV	5.5	5.2		6.5	6.76		p=0.0371
GCRV	1.43	0.95		5.364	4.29		p=0.0002
CyHV-2	1.5	1.67		2.5	2.63		p=0.01037

## Sheet: 3 F
	shNC			shcdk2#1			p值
SVCV	5.68	6		4.956	4.421		p=0.0171
GCRV	5.45	5.5		4.5	3.8		p=0.0087
CyHV-2	2.15	2.202		1.19	1.335		p=0.0469

## Sheet: 3 G
		Vector+SVCV		CDK2+SVCV		p值
	g	1	0.06115	1.88375	0.025906	p=0.00127434483910004
	l	1	0.07029	2.17827	0.019229	p=0.000797859061439621
	m	1	0.09903	1.93471	0.049238	p=0.00323185083909774
	n	1	0.08195	2.08243	0.015724	p=0.00116966838115354
	p	1	0.06305	2.3793	0.039157	p=0.000697404053753342
		shNC+SVCV		shCDK2+SVCV		p值
	g	1	0.07025	0.5565	0.05856	p=0.0102493620250678
	l	1	0.012505	0.59605	0.013038	p=0.000499126859312975
	m	1	0.0484	0.60381	0.04694	p=0.00708562871649143
	n	1	0.05271	0.55196	0.0325	p=0.00454333441857149
	p	1	0.04575	0.52803	0.06794	p=0.00718724422579805

## Sheet: 3 I
Vector					CDK2					p值
282.95	267.57	279.51	267.95	274.7	584.09	575.12	559.47	559.23	546.98	p<0.0001
shNC+SVCV					shCDK2#1+SVCV					p值
335.69	361.32	372.04	375.78	327	136.4	141.31	146.64	141.22	129.52	p<0.0001
