# Supplementary material for: Fish CDK2 recruits Dtx4 to degrade TBK1 through ubiquitination in the antiviral response
Source: eLife. 2026 Jan 14;13:RP98357. doi: 10.7554/eLife.98357 (PMC12803515; doi:10.7554/eLife.98357)
Supplement: Figure 4—source data 3. [file elife-98357-fig4-data3.xlsx]

## Sheet: 4 A
IFNφ1pro
	Vector		CDK2		p值
Control	10.4828	10.6083	10.2698	10.6233
MAVS	2572	2476	755.316	786.59	p<0.0001
TBK1	743.01	805.329	500.788	500.165	p=0.0015
MITA	1968	1825	1709	1734
ISRE
	Vector		CDK2		p值
Control	63.3074	62.2278	69.7418	66.0111
MAVS	1603	1546	695.69	626.812	p<0.0001
TBK1	343.573	342.02	165.144	145.385	p=0.0003
MITA	445.052	438.374	457.089	416.292

## Sheet: 4 B
IFNφ1pro
	shNC		shCDK2#1		p值
Control	8.7074	7.8267	7.0855	7.1544
MAVS	1495	1407	1718	1738	p=0.0001
TBK1	330.641	332.547	413.147	424.764	p=0.047
ISRE
	shNC		shCDK2#1		p值
Control	4.8482	4.8241	6.597	7.1077
MAVS	603.12	614.846	871.819	828.793	p<0.0001
TBK1	78.8569	76.6081	115.273	125.107	p=0.03537

## Sheet: 4 C
ifn
	Vector		CDK2		p值
Control	1	0.01381	0.66256	0.026787
TBK1	30.7708	0.23459	14.2911	0.2192	p=0.0000947901386853395
vig1
	Vector		CDK2		p值
Control	1	0.06461	0.40155	0.013971
TBK1	30.578	2.24339	14.4499	1.03725	p=0.00531895256112266

## Sheet: 4 D
ifn
	shNC		shcdk2#1		p值
Control	1	0.06125	1.70939	0.09476
TBK1	12.0821	1.17329	18.4237	1.15539	p=0.0160482640852946
vig1
	shNC		shcdk2#1
Control	1	0.19986	1.54365	0.26595
TBK1	97.5088	11.104	239.226	12.4929	p=0.00343385395910933

## Sheet: 4 E
	Green (CDK2)	Red (TBK1)
Axis [m]	ROI.01 []	ROI.01 []
0	0.385545	0.20585
4.54e-08	0.356611	0.26269
9.09e-08	0.381714	0.29608
1.36e-07	0.480256	0.340156
1.82e-07	0.464916	0.475095
2.27e-07	0.580816	0.573014
2.73e-07	0.589397	0.552011
3.18e-07	0.709476	0.667383
3.64e-07	0.729827	0.853315
4.09e-07	0.871206	0.880029
4.54e-07	0.961037	0.943031
5e-07	0.985056	0.962736
5.45e-07	0.996917	0.991648
5.91e-07	1	1
6.36e-07	1	1
6.82e-07	1	1
7.27e-07	1	1
7.73e-07	1	1
8.18e-07	1	1
8.63e-07	1	1
9.09e-07	0.972672	0.999431
9.54e-07	0.95817	0.999835
1e-06	0.750031	0.899237
1.05e-06	0.702693	0.792428
1.09e-06	0.683246	0.739583
1.14e-06	0.63553	0.749181
1.18e-06	0.612707	0.75779
1.23e-06	0.616152	0.776058
1.27e-06	0.674303	0.774576
1.32e-06	0.74637	0.768562
1.36e-06	0.769336	0.859217
1.41e-06	0.771385	0.873703
1.45e-06	0.808901	0.88821
1.5e-06	0.843463	0.906285
1.55e-06	0.875592	0.896319
1.59e-06	0.875271	0.900457
1.64e-06	0.835544	0.871055
1.68e-06	0.847679	0.878964
1.73e-06	0.885955	0.909568
1.77e-06	0.965455	0.977511
1.82e-06	0.999293	0.999002
1.86e-06	1	1
1.91e-06	1	1
1.95e-06	1	1
2e-06	1	1
2.04e-06	1	1
2.09e-06	1	1
2.14e-06	1	1
2.18e-06	1	1
2.23e-06	1	1
2.27e-06	1	1
2.32e-06	1	1
2.36e-06	1	1
2.41e-06	1	1
2.45e-06	1	1
2.5e-06	1	1
2.54e-06	1	0.999782
2.59e-06	0.999009	0.993903
2.64e-06	0.991598	0.999435
2.68e-06	0.97407	0.993901
2.73e-06	0.973919	0.987218
2.77e-06	0.994844	0.988262
2.82e-06	1	0.998865
2.86e-06	0.99716	0.957393
2.91e-06	0.968344	0.942551
2.95e-06	0.953336	0.919985
3e-06	0.951762	0.916506
3.04e-06	0.961079	0.978869
3.09e-06	0.988814	0.950875
3.14e-06	0.974664	0.937242
3.18e-06	0.984407	0.972564
3.23e-06	0.993011	0.960219
3.27e-06	0.990194	0.98602
3.32e-06	0.999308	0.995659
3.36e-06	1	0.994138
3.41e-06	1	0.969709
3.45e-06	1	1
3.5e-06	0.998541	1
3.54e-06	0.995332	1
3.59e-06	1	0.999215
3.64e-06	0.991008	1
3.68e-06	0.973795	0.990809
3.73e-06	0.971082	0.95605
3.77e-06	0.972108	0.985588
3.82e-06	0.957202	0.961286
3.86e-06	0.896228	0.878422
3.91e-06	0.691159	0.903212
3.95e-06	0.673053	0.787021
4e-06	0.704634	0.683435
4.04e-06	0.66197	0.625622
4.09e-06	0.56088	0.637239
4.14e-06	0.578087	0.471251
4.18e-06	0.544413	0.333118
4.23e-06	0.515888	0.291556
4.27e-06	0.544579	0.325997
4.32e-06	0.51887	0.375374
4.36e-06	0.535533	0.239689
4.41e-06	0.527683	0.205938
4.45e-06	0.515551	0.314854
4.5e-06	0.515051	0.415236
4.54e-06	0.625751	0.481708
4.59e-06	0.595407	0.474436
4.64e-06	0.634907	0.527081
4.68e-06	0.760488	0.611742
4.73e-06	0.653291	0.730741
4.77e-06	0.671491	0.771336
4.82e-06	0.669494	0.721724
4.86e-06	0.658402	0.695523
4.91e-06	0.660112	0.734373
4.95e-06	0.552267	0.733264
5e-06	0.610329	0.577299
5.04e-06	0.571838	0.540761
5.09e-06	0.612044	0.494942
5.14e-06	0.615219	0.454294
5.18e-06	0.501897	0.554932
5.23e-06	0.539622	0.528249
5.27e-06	0.417506	0.397075
5.32e-06	0.509976	0.450943
5.36e-06	0.431292	0.322643
5.41e-06	0.382373	0.327497
5.45e-06	0.391392	0.355615
5.5e-06	0.392606	0.214445
5.54e-06	0.308442	0.28412
5.59e-06	0.396685	0.203329
5.64e-06	0.388018	0.287746
5.68e-06	0.411806	0.300915
5.73e-06	0.391312	0.161158
5.77e-06	0.323855	0.17231
5.82e-06	0.377268	0.196221
5.86e-06	0.399819	0.134855
5.91e-06	0.457834	0.0856249
5.95e-06	0.4081	0.190002
6e-06	0.480333	0.153294
6.04e-06	0.456099	0.228338
6.09e-06	0.389693	0.224049
6.13e-06	0.413247	0.12477
6.18e-06	0.42194	0.233157
6.23e-06	0.447544	0.154643
6.27e-06	0.425921	0.166673
6.32e-06	0.468136	0.133829
6.36e-06	0.491918	0.198539
6.41e-06	0.377304	0.120133
6.45e-06	0.33345	0.106159
6.5e-06	0.354329	0.0755105
6.54e-06	0.368993	0.115426
6.59e-06	0.367631	0.156307
6.63e-06	0.375113	0.0940394
6.68e-06	0.40884	0.116653
6.73e-06	0.40123	0.113858
6.77e-06	0.349372	0.0885526
6.82e-06	0.39106	0.109167
6.86e-06	0.312197	0.11236

## Sheet: 4 N
			p值
TBK1-Myc+SVCV	8.5	8.2	p=0.0160626088678921
CDK2-HA+SVCV	3.3	3.5	p=0.019786294938684
TBK1-Myc+CDK2-HA+SVCV	4.43	4.78

## Sheet: 4 P
SVCV					SVCV+TBK1					SVCV+TBK1+CDK2
490.56	507.6	501.65	494.9	521.23	121.03	132.3	129.5	132.23	112.42	292.72	302.32	270.29	319.63	310.37
p值	p<0.0001										p<0.0001

## Sheet: 4 Q
	SVCV		SVCV+TBK1		SVCV+TBK1+CDK2		p值
g	1	0.02219	0.45446	0.02787	0.91125	0.0393	p=0.00105371622265269	p=0.0027068326514086
l	1	0.01183	0.31408	0.03052	0.79101	0.03691	p=0.000506672228006109	p=0.00248745282516871
m	1	0.014602	0.27953	0.03793	0.67598	0.0485	p=0.00070672930290625	p=0.00586579333572225
n	1	0.015405	0.19283	0.01992	0.67216	0.02454	p=0.000240541124504191	p=0.0010758126760569
p	1	0.0289	0.19585	0.00882	0.71296	0.03385	p=0.000300738105804958	p=0.000946046811475169
