# Supplementary material for: Fish CDK2 recruits Dtx4 to degrade TBK1 through ubiquitination in the antiviral response
Source: eLife. 2026 Jan 14;13:RP98357. doi: 10.7554/eLife.98357 (PMC12803515; doi:10.7554/eLife.98357)
Supplement: Figure 5—source data 3. [file elife-98357-fig5-data3.xlsx]

## Sheet: 5 A
	Vector		CDK2
Null	1	0.0716	1.00694	0.02175
poly I:C	2.96358	0.16181	2.85026	0.10446	p=0.0243615839288507
SVCV	2.00444	0.12259	1.80898	0.14395	p=0.0140256843044041
