# Supplementary material for: Fish CDK2 recruits Dtx4 to degrade TBK1 through ubiquitination in the antiviral response
Source: eLife. 2026 Jan 14;13:RP98357. doi: 10.7554/eLife.98357 (PMC12803515; doi:10.7554/eLife.98357)
Supplement: Figure 6—source data 3. [file elife-98357-fig6-data3.xlsx]

## Sheet: 6 E
IFNφ1pro
	Vector		CDK2			p值
Control	1.389	1.4614	2.042	1.7584	Vector
TBK1	50.2722	49.27	25.0178	26.5915		p<0.0001
Control	1.3503	1.4917	1.5869	1.5846	Dtx4
TBK1	43.7913	42.5384	12.3957	11.3496		<0.0001

## Sheet: 6 F
ifn
	Vector		CDK2			p值
Control	1	0.05865	0.4075	0.0755	Vector
TBK1	28.175	1.57299	11.3076	1.16629		p=0.00328822248596603
Control	0.80855	0.15631	0.25688	0.0645	Dtx4
TBK1	25.767	1.14818	7.36316	0.19281		p=0.000774136945309067
vig1
	Vector		CDK2
Control	1	0.38853	0.78976	0.08127	Vector
TBK1	29.5606	1.00112	14.5803	1.01925		p=0.00225835556077775
Control	0.6445	0.07212	0.53681	0.01251	Dtx4
TBK1	25.9339	0.19672	8.79062	0.25686		p=0.0000879941628239452

## Sheet: 6 J
IFNφ1pro
	Vector		CDK2			p值
Control	1.209	1.463	1.2079	1.1234	shNC
TBK1	25.7746	24.46	8.605	9.5501		p<0.0001
Control	1.3398	1.1432	1.2108	1.2165	shdtx4#1
TBK1	27.3656	26.2221	25.4935	26.2589

## Sheet: 6 K
ifn
	Vector		CDK2			p值
Control	1	0.02385	1.02444	0.07473	shNC
TBK1	19.3571	0.058243	6.81734	0.43328		p=0.000229164466882063
Control	1.16447	0.24688	0.5866	0.06888	shdtx4#1
TBK1	20.1587	0.55702	23.8236	0.77273
vig1
	Vector		CDK2			p值
Control	1	0.02044	0.61515	0.06319	shNC
TBK1	27.1075	0.60374	12.2455	0.44617		p=0.000627322385503078
Control	1.05757	0.11135	0.55593	0.09402	shdtx4#1
TBK1	29.0092	0.4805	31.987	0.89514
