# Supplementary material for: Fish CDK2 recruits Dtx4 to degrade TBK1 through ubiquitination in the antiviral response
Source: eLife. 2026 Jan 14;13:RP98357. doi: 10.7554/eLife.98357 (PMC12803515; doi:10.7554/eLife.98357)
Supplement: Figure 7—source data 3. [file elife-98357-fig7-data3.xlsx]

## Sheet: 7 J
	Vector		CDK2		p值
Control	3.9731	4.614	3.6175	3.9832
TBK1	59.2853	60.2278	21.7978	24.8729	p<0.0001
TBK1-K567R	54.0716	51.6911	45.9361	43.7071

## Sheet: 7 K
ifn
	Vector		CDK2		p值
Control	1	0.12577	0.62402	0.08107
TBK1	23.6082	0.08716	8.53709	0.22076	p=0.000055443971025464
TBK1-K567R	21.7219	1.01762	20.8349	0.9899

## Sheet: 7 L
	SVCV		SVCV+TBK1		SVCV+TBK1+CDK2		SVCV+TBK1-K567R		SVCV+TBK1-K567R+CDK2
	7.5	8.5	4.68	5.14	7.36	7.27	6.928	6.346	6.928	6.8
p值			p=0.0017		p=0.3527		p=0.0522		p=0.0967

## Sheet: 7 N
	SVCV		SVCV+TBK1		SVCV+TBK1+CDK2		SVCV+TBK1-K567R		SVCV+TBK1-K567R+CDK2
g	1	0.0127	0.20175	0.01639	0.35897	0.01714	0.22616	0.00959	0.23724	0.00489
l	1	0.01398	0.2693	0.02767	0.45387	0.02485	0.27794	0.0135	0.28889	0.01041
m	1	0.01454	0.16291	0.02143	0.31896	0.00877	0.18381	0.00613	0.19514	0.01092
n	1	0.06056	0.17682	0.00282	0.33276	0.02508	0.20056	0.01745	0.22119	0.00742
p	1	0.05569	0.20956	0.01704	0.41406	0.014	0.21635	0.00967	0.22809	0.00851
p值
g			p=3.56138551035001E-06		p=7.99553562787825E-06		p=2.69192943222797E-06		p=0.0000174723866721402
l			p=0.0000584926391514037		p=0.0000660130435029381		p=7.36520016741742E-08		p=0.0000042005497920342
m			p=0.0000112908899617437		p=0.0000119629847349915		p=0.0000176943717802958		p=3.37148172056282E-06
n			p=0.000817986110553489		p=0.000470585314315062		p=0.000483951853382966		p=0.000774139603325464
p			p=0.000398007383659599		p=0.000841605673220241		p=0.000573785574980332		p=0.00062147118380349

## Sheet: 7 O
	SVCV					SVCV+TBK1					SVCV+TBK1+CDK2					SVCV+TBK1-K567R					SVCV+TBK1-K567R+CDK2
	532.6	478.98	500.39	517.4	523.44	125.35	108.21	116.76	108.5	103.65	323.1	292.49	298.68	280.75	297.32	145.88	138.88	149.54	147.17	137.95	146.59	144.67	135.96	141.17	141.26
p值						p<0.0001					p<0.0001					p<0.0001					p<0.0001
