# Supplementary material for: Fish CDK2 recruits Dtx4 to degrade TBK1 through ubiquitination in the antiviral response
Source: eLife. 2026 Jan 14;13:RP98357. doi: 10.7554/eLife.98357 (PMC12803515; doi:10.7554/eLife.98357)
Supplement: Supplementary file 1. [file elife-98357-supp1.docx]

Supplementary file 1. Primers used in this study.

| **Name** | **Sequence (5’→3’)** | **Purpose** |
| --- | --- | --- |
| pCMV-HA-CDK2-F | CCGGAATTCCGATGGAGTCTTTTCAGAAAGTG | Eukaryotic expression |
| pCMV-HA-CDK2-R | CCGCTCGAGTTATAGGCGTAAAGGAGGCAC |
| mCherry-MAVS-F | CGCGGATCCGCCACCATGTCACTGACACGTGAGC |
| mCherry-MAVS-R | CCCATCGATATGATTGAGCTTCCAG |
| mCherry-TBK1-F | CGCGGATCCGCCACCATGCAGAGTACGGCCAAT |
| mCherry-TBK1-R | CCGGAATTCCGCATCCGCTCCACTG |
| pEGFP-N3-CDK2-F | CTAGCTAGCATGGAGTCTTTTCAGAAAGTG |
| pEGFP-N3-CDK2-R | CGCGGATCCTAGGCGTAAAGGAGGCAC |
| pCMV-Myc-MAVS-F | CCGCTCGAGCGATGTCACTGACACGTGAGC |
| pCMV-Myc-MAVS-R | ATTTGCGGCCGCTTAATGATTGAGCTTCCAG |
| pCMV-Myc-TBK1-F | CGCGGATCCCGATGCAGAGTACGGCCAAT |
| pCMV-Myc-TBK1-R | AACTCGAGTCACATCCGCTCCACTG |
| pCMV-Tag2C-TBK1∆N-F | CCGGAATTCCGATGCAGAGTACGGCCAATTACCTGTGGATGATGTCCGACCTGACAGCGAACCTCTTC |
| pCMV-Tag2C-TBK1∆N-R | AACTCGAGTCACATCCGCTCCACTG |
| pCMV-Tag2C-TBK1∆C-F | CCGGAATTCCGCTGGGTCAGGGAGCCACAGC |
| pCMV-Tag2C-TBK1∆C-R | AACTCGAGTTAGTTGTAAGTGTGTATGTAG |
| pCMV-Tag2C/HA/Myc-Dtx4-F | CGGAATTCCGATGGACACGATGTTGCTG |
| pCMV-Tag2C/HA/Myc-Dtx4-R | CCGCTCGAGTCACAGGAGCTGTTCCTC |
| pCMV-Myc-trim11-F | CGGAATTCCGATGGCGTCCTCCAGTGTTTTG |
| pCMV-Myc-trim11-R | AAAAGCGGCCGCTTAATAGACAGGTGTGATG |
| pCMV-Myc-Traip-F | CGGAATTCCGATGCCCATTCGAGCATAC |
| pCMV-Myc-Traip-R | CCGCTCGAG TTATTCCAAGAACCCGTCC |
| pCMV-Myc-Socs3a-F | CGGAATTCCG ATGATAACCCACAGCAAG |
| pCMV-Myc-Socs3a-R | CCGCTCGAGTTAAATAGGGGCGTCATAC |
| pCMV-Myc-Dtx4∆WWE-F | CGGAATTCCGATGGACACGATGTTGCTGGCTGTCTCTGGGCCTCTGCCAAA | Eukaryotic expression |
| pCMV-Myc-Dtx4∆WWE-R | CCGCTCGAGTCACAGGAGCTGTTCCTC |
| pCMV-Myc-Dtx4∆RING-F | AGAAGGTCAGGAGTCCACCAGTAAAGACAGGCAACCAGCC |
| pCMV-Myc-Dtx4∆RING-R | GGCTGGTTGCCTGTCTTTACTGGTGGACTCCTGACCTTCT |
| pCMV-Myc-Dtx4∆DTC-F | CGGAATTCCGATGGACACGATGTTGCTG |
| pCMV-Myc-Dtx4∆DTC-R | CCGCTCGAGTTACTTTACTCCATATATAGT |
| sh*-cdk2*#1-F | CCGGGCACTGCCATACGTGAGATCTCTCGAGAGATCTCACG TATGGCAGTGCTTTTTG | Knock-down |
| sh-*cdk2*#1-R | AATTCAAAAAGCACTGCCATACGTGAGATCTCTCGAGAGATCTCACGTATGGCAGTGC |
| sh-*cdk2*#2-F | CCGGGGGTGGTTTATAAAGCCAAGACTCGAGTCTTGGCTTT ATAAACCACCCTTTTTG |
| sh-*cdk2*#2-R | AATTCAAAAAGGGTGGTTTATAAAGCCAAGACTCGAGTCTTGGCTTTATAAACCACCC |
| sh*-dtx4*#1-F | CCGGAGTACCAGTGAAGAATCTTAACTCGAGTTAAGATTCTTCACTGGTACTTTTTTG |
| sh-*dtx4*#1-R | AATTCAAAAAAGTACCAGTGAAGAATCTTAACTCGAGTTAAGATTCTTCACTGGTACT |
| sh*-dtx4*#2-F | CCGGGGATTTCCCCGTCATTGTTATCTCGAGATAACAATGACGGGGAAATCCTTTTTG |
| sh*-dtx4*#2-R | AATTCAAAAAGGATTTCCCCGTCATTGTTATCTCGAGATAACAATGACGGGGAAATCC |
| *Dr-cdk2-*F | CAGAAAGTGGAGAAGATCGGAG | Real-time PCR  Real-time PCR |
| *Dr-cdk2-*R | AGTCCATAAACCTCTTCAG |
| *Dr-β-actin*-F | CCGTGACATCAAGGAGAAGCT |
| *Dr-β-actin*-R | TCGTGGATACCGCAAGATTCC |
| *epc*-*β-actin-*F | CACTGTGCCCATCTACGAG |
| *epc*-*β-actin-*R | CCATCTCCTGCTCGAAGT |
| *epc*-*cdk2-*F | GTGTTCCCAGCACTGCCATA |
| *epc*-*cdk2-*R | GGTAACTCTTCACGAGTGGCA |
| *epc-ifn*-F | ATGAAAACTCAAATGTGGACGTA |
| *epc*-*ifn-*R | GATAGTTTCCACCCTTTCCTTAA |
| *epc*-*vig1-*F | AGCGAGGCTTACGACTTCTG |
| *epc*-*vig1-*R | GCACCAACTCTCCCAGAAAA |
| *p-*F | TTGGACCTGGGATAGTGA |
| *p-*R | CTTGCTTGGTTTGTGGG |
| *n-*F | TGAGTGCTGAGGACGAT |
| *n-*R | TTTGTGAGTTGCCGTTA |
| *g-*F | CGACCTGGATTAGACTTG |
| *g-*R | AATGTTCCGTTTCTCACT |
| *l-*F | GCCCACTTTGCATCCAGTCC |
| *l-*R | GAGATGCCACAGACTCCTCC |
| *m-*F | TACTCCTCCCACTTACGA |
| *m-*R | CAAGAGTCCGAGAAGGTC |
